# Supplementary material for: Personality-based pair programming: toward intrinsic motivation alignment in very small entities
Source: PeerJ journal article supplement (doi:10.7717/peerj-cs.2774), 2025-04-01

# Experiment - 1.4.2022 (IGA-34/2021)

Dear University Student of Software Engineering Course,

**Procedure:**

If you agree to be in this study, you will be asked to do the following:

1. Perform 6 software engineering tasks, each taking 10 minutes.
2. Report your intrinsic motivation associated with the activity.
3. Answer questions about your personality.

The total time required to complete the study should be approximately 70 minutes. You will receive extra credit in your software engineering course for participating and have your psychometric results delivered to you in paper form, should you choose so.

**Benefits/Risks to Participant:**

Participants will learn about the empirical methodologies of and will help contribute to the body of knowledge in software engineering and psychology. Risks include any discomfort you may feel while performing the tasks and rating your motivation or responding to personality measurement questions.

**Voluntary Nature of the Study/Confidentiality:**

Your participation in this study is entirely voluntary and you may refuse to complete the study at any point during the experiment or refuse to answer any questions with which you are uncomfortable. You may also stop at any time and ask the researcher any questions you may have. Your name will never be connected to your results or to your responses on the questionnaires; instead, a number will be used for identification purposes. Information that would make it possible to identify you or any other participant will never be included in any sort of report. The data will be accessible only to those working on the project.

Thank You for participating in the Research on motivation management in software development teams (IGA-34/2021).

Marcel Valový and Alena Buchalceová  
Information Technologies Department  
Prague University of Economics and Business  
[xvalm00@vse.cz](mailto:xvalm00@vse.cz)

\* Required

1. I have read the Consent Form 1.4.2022 and I: \*

- ☐ Agree to Participate
- ☐ Do not agree to Participate

2. I have x year(s) of experience: \*

The value must be a number

3. I am a: \*

- ☐ Male
- ☐ Female
- ☐ Prefer not to say

#### 4. Big Five Inventory-10 (Rammstedt & John, 2007)

*This question should take one minute or less.*

**Instructions:** How well do the following statements describe your personality?

The stem is "I see myself as someone who..." \*

|                                        | Disagree strongly     | Disagree a little     |
|----------------------------------------|-----------------------|-----------------------|
| 1. ...is reserved.                     | <input type="radio"/> | <input type="radio"/> |
| 2. ...is generally trusting.           | <input type="radio"/> | <input type="radio"/> |
| 3. ...tends to be lazy.                | <input type="radio"/> | <input type="radio"/> |
| 4. ...is relaxed, handles stress well. | <input type="radio"/> | <input type="radio"/> |
| 5. ...has few artistic interests.      | <input type="radio"/> | <input type="radio"/> |
| 6. ...is outgoing, sociable.           | <input type="radio"/> | <input type="radio"/> |
| 7. ...tends to find fault with others. | <input type="radio"/> | <input type="radio"/> |
| 8. ...does a thorough job.             | <input type="radio"/> | <input type="radio"/> |
| 9. ...gets nervous easily.             | <input type="radio"/> | <input type="radio"/> |
| 10. ...has an active imagination.      | <input type="radio"/> | <input type="radio"/> |

5. Intrinsic Motivation Inventory (The Self-determination Framework, Ryan & Deci, 2015)

Interest/Enjoyment - 10 \*

|                                                                                | Disagree strongly     | Disag |
|--------------------------------------------------------------------------------|-----------------------|-------|
| 1. I enjoyed doing this activity very much                                     | <input type="radio"/> |       |
| 2. This activity was fun to do                                                 | <input type="radio"/> |       |
| 3. I thought this was a boring activity                                        | <input type="radio"/> |       |
| 4. This activity did not hold my attention at all                              | <input type="radio"/> |       |
| 5. I would describe this activity as very interesting                          | <input type="radio"/> |       |
| 6. I thought this activity was quite enjoyable                                 | <input type="radio"/> |       |
| 7. While I was doing this activity, I was thinking about how much I enjoyed it | <input type="radio"/> |       |
| I was a: Pilot = Option 1, Solo = Option 3, Navigator = Option 5               | <input type="radio"/> |       |

6. Interest/Enjoyment - 20 \*

|                                                                                | Disagree strongly     | Disag |
|--------------------------------------------------------------------------------|-----------------------|-------|
| 1. I enjoyed doing this activity very much                                     | <input type="radio"/> |       |
| 2. This activity was fun to do                                                 | <input type="radio"/> |       |
| 3. I thought this was a boring activity                                        | <input type="radio"/> |       |
| 4. This activity did not hold my attention at all                              | <input type="radio"/> |       |
| 5. I would describe this activity as very interesting                          | <input type="radio"/> |       |
| 6. I thought this activity was quite enjoyable                                 | <input type="radio"/> |       |
| 7. While I was doing this activity, I was thinking about how much I enjoyed it | <input type="radio"/> |       |
| I was a: Pilot = Option 1, Solo = Option 3, Navigator = Option 5               | <input type="radio"/> |       |

7. Interest/Enjoyment - 30 \*

|                                                                                | Disagree strongly     | Disag |
|--------------------------------------------------------------------------------|-----------------------|-------|
| 1. I enjoyed doing this activity very much                                     | <input type="radio"/> |       |
| 2. This activity was fun to do                                                 | <input type="radio"/> |       |
| 3. I thought this was a boring activity                                        | <input type="radio"/> |       |
| 4. This activity did not hold my attention at all                              | <input type="radio"/> |       |
| 5. I would describe this activity as very interesting                          | <input type="radio"/> |       |
| 6. I thought this activity was quite enjoyable                                 | <input type="radio"/> |       |
| 7. While I was doing this activity, I was thinking about how much I enjoyed it | <input type="radio"/> |       |
| I was a: Pilot = Option 1, Solo = Option 3, Navigator = Option 5               | <input type="radio"/> |       |

8. Interest/Enjoyment - 40 \*

|                                                                                | Disagree strongly     | Disag |
|--------------------------------------------------------------------------------|-----------------------|-------|
| 1. I enjoyed doing this activity very much                                     | <input type="radio"/> |       |
| 2. This activity was fun to do                                                 | <input type="radio"/> |       |
| 3. I thought this was a boring activity                                        | <input type="radio"/> |       |
| 4. This activity did not hold my attention at all                              | <input type="radio"/> |       |
| 5. I would describe this activity as very interesting                          | <input type="radio"/> |       |
| 6. I thought this activity was quite enjoyable                                 | <input type="radio"/> |       |
| 7. While I was doing this activity, I was thinking about how much I enjoyed it | <input type="radio"/> |       |
| I was a: Pilot = Option 1, Solo = Option 3, Navigator = Option 5               | <input type="radio"/> |       |

9. Interest/Enjoyment - 50 \*

|                                                                                | Disagree strongly     | Disag |
|--------------------------------------------------------------------------------|-----------------------|-------|
| 1. I enjoyed doing this activity very much                                     | <input type="radio"/> |       |
| 2. This activity was fun to do                                                 | <input type="radio"/> |       |
| 3. I thought this was a boring activity                                        | <input type="radio"/> |       |
| 4. This activity did not hold my attention at all                              | <input type="radio"/> |       |
| 5. I would describe this activity as very interesting                          | <input type="radio"/> |       |
| 6. I thought this activity was quite enjoyable                                 | <input type="radio"/> |       |
| 7. While I was doing this activity, I was thinking about how much I enjoyed it | <input type="radio"/> |       |
| I was a: Pilot = Option 1, Solo = Option 3, Navigator = Option 5               | <input type="radio"/> |       |



## 10. Interest/Enjoyment - 60 \*

|                                                                                | Disagree strongly     | Disag |
|--------------------------------------------------------------------------------|-----------------------|-------|
| 1. I enjoyed doing this activity very much                                     | <input type="radio"/> |       |
| 2. This activity was fun to do                                                 | <input type="radio"/> |       |
| 3. I thought this was a boring activity                                        | <input type="radio"/> |       |
| 4. This activity did not hold my attention at all                              | <input type="radio"/> |       |
| 5. I would describe this activity as very interesting                          | <input type="radio"/> |       |
| 6. I thought this activity was quite enjoyable                                 | <input type="radio"/> |       |
| 7. While I was doing this activity, I was thinking about how much I enjoyed it | <input type="radio"/> |       |
| I was a: Pilot = Option 1, Solo = Option 3, Navigator = Option 5               | <input type="radio"/> |       |

---

## 11. I want my psychometric results (in a paper or electronic confidential form): \*

☐ Yes☐ No

## 12. My initials are: \*

This content is neither created nor endorsed by Microsoft. The data you submit will be sent to the form owner.

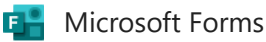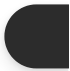

Supplement: Experimental_Questionnaire.pdf [file Experimental_Questionnaire.pdf]
