# Supplementary material for: Personality-based pair programming: toward intrinsic motivation alignment in very small entities
Source: PeerJ Comput Sci. 2025 Apr 1;11:e2774. doi: 10.7717/peerj-cs.2774 (PMC12190715; doi:10.7717/peerj-cs.2774)
Supplement: Supplemental Information 1 [file peerj-cs-11-2774-s001.xlsx]

## Sheet: Sheet1
ID	Start time	Completion time	Email	Name	I have read the Consent Form 1.4.2022 and I:	I have x year(s) of experience:	I am a:	1. …is reserved.	2. …is generally trusting.	3. …tends to be lazy.	4. …is relaxed, handles stress well.	5. …has few artistic interests.	6. …is outgoing, sociable.	7. …tends to find fault with others.	8. …does a thorough job.	9. …gets nervous easily.	10. …has an active imagination.	1. I enjoyed doing this activity very much	2. This activity was fun to do	3. I thought this was a boring activity	4. This activity did not hold my attention at all	5. I would describe this activity as very interesting	6. I thought this activity was quite enjoyable	7. While I was doing this activity, I was thinking about how much I enjoyed it	I was a: Pilot = Option 1, Solo = Option 3, Navigator = Option 5	1. I enjoyed doing this activity very much2	2. This activity was fun to do2	3. I thought this was a boring activity2	4. This activity did not hold my attention at all2	5. I would describe this activity as very interesting2	6. I thought this activity was quite enjoyable2	7. While I was doing this activity, I was thinking about how much I enjoyed it2	I was a: Pilot = Option 1, Solo = Option 3, Navigator = Option 52	1. I enjoyed doing this activity very much3	2. This activity was fun to do3	3. I thought this was a boring activity3	4. This activity did not hold my attention at all3	5. I would describe this activity as very interesting3	6. I thought this activity was quite enjoyable3	7. While I was doing this activity, I was thinking about how much I enjoyed it3	I was a: Pilot = Option 1, Solo = Option 3, Navigator = Option 53	1. I enjoyed doing this activity very much4	2. This activity was fun to do4	3. I thought this was a boring activity4	4. This activity did not hold my attention at all4	5. I would describe this activity as very interesting4	6. I thought this activity was quite enjoyable4	7. While I was doing this activity, I was thinking about how much I enjoyed it4	I was a: Pilot = Option 1, Solo = Option 3, Navigator = Option 54
1	2022-04-01 09:28:39	2022-04-01 10:50:44	anonymous		Agree to Participate	1.5	Male	Disagree a little	Agree a little	Agree strongly	Agree a little	Neither agree nor disagree	Agree a little	Disagree a little	Agree a little	Disagree strongly	Neither agree nor disagree	Agree strongly	Agree strongly	Disagree strongly	Disagree strongly	Agree a little	Agree a little	Disagree strongly	Disagree strongly	Agree strongly	Agree a little	Disagree a little	Disagree strongly	Disagree a little	Disagree a little	Disagree strongly	Agree strongly	Agree strongly	Agree strongly	Disagree strongly	Disagree strongly	Agree a little	Agree strongly	Disagree strongly	Disagree strongly	Agree a little	Agree a little	Disagree strongly	Disagree strongly	Agree a little	Agree a little	Disagree strongly	Agree strongly
2	2022-04-01 09:28:24	2022-04-01 10:51:04	anonymous		Agree to Participate	0.5	Male	Agree a little	Agree a little	Agree strongly	Disagree strongly	Neither agree nor disagree	Disagree strongly	Disagree a little	Agree strongly	Agree a little	Disagree a little	Disagree a little	Agree a little	Disagree a little	Disagree strongly	Neither agree nor disagree	Agree a little	Disagree strongly	Disagree strongly	Disagree strongly	Disagree a little	Disagree a little	Disagree strongly	Disagree a little	Disagree a little	Disagree strongly	Agree strongly	Neither agree nor disagree	Disagree a little	Disagree a little	Disagree strongly	Disagree a little	Neither agree nor disagree	Disagree strongly	Disagree strongly	Disagree strongly	Disagree a little	Neither agree nor disagree	Disagree strongly	Disagree strongly	Disagree a little	Disagree strongly	Agree strongly
3	2022-04-01 09:31:04	2022-04-01 10:51:13	anonymous		Agree to Participate	0.5	Male	Disagree a little	Agree a little	Agree a little	Agree strongly	Agree a little	Disagree a little	Disagree a little	Disagree a little	Agree a little	Agree a little	Agree strongly	Agree a little	Disagree a little	Disagree strongly	Agree a little	Agree a little	Disagree strongly	Disagree strongly	Agree a little	Agree a little	Disagree a little	Disagree a little	Agree a little	Agree a little	Disagree strongly	Agree strongly	Agree strongly	Agree a little	Disagree strongly	Disagree strongly	Agree a little	Agree strongly	Disagree strongly	Disagree strongly	Agree a little	Agree a little	Disagree a little	Agree a little	Agree a little	Neither agree nor disagree	Disagree strongly	Agree strongly
4	2022-04-01 09:27:33	2022-04-01 10:51:15	anonymous		Agree to Participate	0.5	Male	Agree a little	Neither agree nor disagree	Agree strongly	Neither agree nor disagree	Disagree strongly	Neither agree nor disagree	Agree strongly	Agree a little	Neither agree nor disagree	Agree a little	Disagree strongly	Disagree a little	Agree a little	Disagree strongly	Agree a little	Agree a little	Disagree strongly	Agree strongly	Agree a little	Agree a little	Disagree strongly	Disagree strongly	Agree a little	Agree a little	Neither agree nor disagree	Disagree strongly	Disagree strongly	Disagree a little	Agree a little	Disagree strongly	Agree a little	Agree a little	Disagree strongly	Agree strongly	Agree a little	Agree a little	Disagree strongly	Disagree strongly	Agree a little	Agree a little	Neither agree nor disagree	Disagree strongly
5	2022-04-01 09:29:19	2022-04-01 10:51:19	anonymous		Agree to Participate	1	Male	Agree a little	Neither agree nor disagree	Disagree a little	Agree a little	Disagree a little	Agree a little	Disagree strongly	Agree a little	Agree a little	Agree a little	Neither agree nor disagree	Neither agree nor disagree	Disagree a little	Disagree a little	Neither agree nor disagree	Agree a little	Disagree a little	Agree strongly	Agree strongly	Agree strongly	Disagree strongly	Disagree strongly	Agree a little	Agree strongly	Neither agree nor disagree	Disagree strongly	Agree a little	Agree a little	Disagree strongly	Disagree strongly	Agree a little	Agree strongly	Disagree a little	Agree strongly	Agree a little	Agree a little	Disagree a little	Disagree a little	Agree a little	Agree a little	Neither agree nor disagree	Disagree strongly
6	2022-04-01 09:28:09	2022-04-01 10:51:27	anonymous		Agree to Participate	3.5	Male	Agree a little	Neither agree nor disagree	Neither agree nor disagree	Agree strongly	Disagree a little	Agree strongly	Disagree strongly	Agree a little	Disagree strongly	Agree strongly	Agree strongly	Agree strongly	Disagree strongly	Disagree strongly	Disagree strongly	Agree strongly	Agree strongly	Agree strongly	Agree a little	Agree a little	Agree a little	Disagree strongly	Disagree a little	Disagree a little	Disagree strongly	Disagree strongly	Agree strongly	Agree a little	Disagree strongly	Disagree a little	Agree a little	Agree a little	Disagree strongly	Agree strongly	Agree strongly	Agree strongly	Disagree strongly	Disagree a little	Agree a little	Agree a little	Disagree strongly	Disagree strongly
7	2022-04-01 09:28:20	2022-04-01 10:51:58	anonymous		Agree to Participate	0.5	Male	Neither agree nor disagree	Disagree strongly	Neither agree nor disagree	Agree a little	Agree a little	Disagree a little	Agree a little	Agree a little	Disagree a little	Agree a little	Neither agree nor disagree	Neither agree nor disagree	Disagree a little	Agree a little	Disagree a little	Disagree a little	Disagree strongly	Agree strongly	Agree a little	Agree a little	Neither agree nor disagree	Agree a little	Neither agree nor disagree	Neither agree nor disagree	Disagree strongly	Disagree strongly	Disagree a little	Disagree a little	Agree a little	Agree a little	Disagree a little	Disagree a little	Disagree strongly	Agree strongly	Disagree a little	Disagree a little	Agree a little	Agree strongly	Disagree a little	Disagree a little	Disagree a little	Disagree strongly
8	2022-04-01 09:27:36	2022-04-01 10:52:04	anonymous		Agree to Participate	0.5	Male	Disagree a little	Disagree strongly	Agree a little	Agree a little	Agree a little	Neither agree nor disagree	Agree a little	Agree strongly	Agree a little	Disagree strongly	Neither agree nor disagree	Agree a little	Disagree strongly	Disagree a little	Neither agree nor disagree	Agree a little	Disagree strongly	Disagree strongly	Neither agree nor disagree	Agree a little	Disagree strongly	Disagree strongly	Disagree a little	Agree a little	Disagree strongly	Agree strongly	Neither agree nor disagree	Agree strongly	Disagree strongly	Disagree strongly	Agree a little	Agree strongly	Disagree strongly	Disagree strongly	Agree a little	Agree a little	Disagree strongly	Disagree strongly	Agree a little	Agree a little	Disagree strongly	Agree strongly
9	2022-04-01 09:28:11	2022-04-01 10:52:04	anonymous		Agree to Participate	1.5	Female	Disagree strongly	Agree strongly	Disagree a little	Disagree strongly	Disagree strongly	Agree strongly	Disagree a little	Agree a little	Agree strongly	Agree strongly	Disagree a little	Neither agree nor disagree	Neither agree nor disagree	Agree a little	Disagree a little	Neither agree nor disagree	Disagree a little	Disagree strongly	Disagree a little	Neither agree nor disagree	Agree a little	Disagree a little	Disagree a little	Neither agree nor disagree	Agree a little	Agree strongly	Agree a little	Agree a little	Neither agree nor disagree	Neither agree nor disagree	Neither agree nor disagree	Neither agree nor disagree	Agree a little	Disagree strongly	Disagree a little	Disagree strongly	Agree strongly	Agree a little	Disagree a little	Neither agree nor disagree	Neither agree nor disagree	Disagree strongly
10	2022-04-01 09:28:16	2022-04-01 10:52:07	anonymous		Agree to Participate	0.5	Male	Agree a little	Neither agree nor disagree	Agree strongly	Agree a little	Agree strongly	Disagree a little	Neither agree nor disagree	Disagree a little	Agree a little	Disagree a little	Agree a little	Agree a little	Disagree strongly	Disagree strongly	Agree a little	Agree a little	Disagree strongly	Agree strongly	Agree a little	Agree a little	Disagree a little	Disagree strongly	Disagree a little	Agree a little	Disagree strongly	Disagree strongly	Agree a little	Agree a little	Disagree strongly	Disagree strongly	Neither agree nor disagree	Agree a little	Disagree strongly	Agree strongly	Agree a little	Disagree a little	Disagree strongly	Disagree strongly	Agree a little	Agree a little	Disagree strongly	Disagree strongly
11	2022-04-01 09:30:40	2022-04-01 10:52:09	anonymous		Agree to Participate	0.5	Male	Agree a little	Neither agree nor disagree	Disagree a little	Agree a little	Disagree strongly	Disagree a little	Disagree strongly	Agree a little	Disagree strongly	Agree strongly	Agree a little	Agree strongly	Neither agree nor disagree	Disagree strongly	Neither agree nor disagree	Neither agree nor disagree	Disagree strongly	Disagree strongly	Neither agree nor disagree	Disagree a little	Neither agree nor disagree	Disagree a little	Neither agree nor disagree	Agree a little	Agree a little	Agree strongly	Neither agree nor disagree	Disagree a little	Agree a little	Disagree strongly	Neither agree nor disagree	Neither agree nor disagree	Disagree strongly	Disagree strongly	Agree a little	Disagree a little	Agree a little	Disagree strongly	Neither agree nor disagree	Agree a little	Disagree strongly	Agree strongly
12	2022-04-01 09:31:31	2022-04-01 10:52:13	anonymous		Agree to Participate	0.5	Male	Agree a little	Disagree a little	Disagree a little	Neither agree nor disagree	Disagree strongly	Disagree strongly	Neither agree nor disagree	Agree strongly	Disagree a little	Disagree strongly	Disagree a little	Disagree a little	Disagree strongly	Disagree strongly	Neither agree nor disagree	Disagree a little	Disagree strongly	Agree strongly	Neither agree nor disagree	Neither agree nor disagree	Disagree strongly	Disagree strongly	Disagree a little	Disagree strongly	Disagree strongly	Disagree strongly	Disagree a little	Disagree strongly	Disagree a little	Disagree strongly	Neither agree nor disagree	Disagree a little	Disagree strongly	Agree strongly	Agree a little	Neither agree nor disagree	Disagree strongly	Disagree strongly	Neither agree nor disagree	Neither agree nor disagree	Disagree strongly	Disagree strongly
13	2022-04-01 09:33:31	2022-04-01 10:52:44	anonymous		Agree to Participate	0.5	Female	Disagree a little	Neither agree nor disagree	Disagree a little	Agree a little	Agree a little	Disagree a little	Agree a little	Agree a little	Disagree a little	Disagree a little	Agree a little	Agree a little	Disagree a little	Neither agree nor disagree	Disagree strongly	Agree a little	Disagree strongly	Agree strongly	Agree a little	Agree a little	Disagree a little	Agree a little	Disagree a little	Agree a little	Disagree strongly	Disagree strongly	Agree a little	Agree a little	Disagree strongly	Disagree strongly	Agree a little	Agree strongly	Disagree strongly	Agree strongly	Agree a little	Agree a little	Disagree a little	Disagree strongly	Disagree a little	Agree a little	Disagree strongly	Disagree strongly
14	2022-04-01 09:28:49	2022-04-01 10:53:14	anonymous		Agree to Participate	5	Male	Disagree a little	Agree a little	Agree strongly	Disagree a little	Neither agree nor disagree	Agree a little	Disagree a little	Neither agree nor disagree	Agree strongly	Agree strongly	Neither agree nor disagree	Agree a little	Disagree a little	Disagree a little	Disagree a little	Agree a little	Neither agree nor disagree	Disagree strongly	Agree a little	Disagree a little	Disagree a little	Disagree strongly	Disagree a little	Agree a little	Disagree a little	Agree strongly	Agree a little	Neither agree nor disagree	Disagree a little	Disagree strongly	Disagree a little	Agree a little	Disagree a little	Disagree strongly	Agree a little	Neither agree nor disagree	Disagree strongly	Disagree strongly	Disagree a little	Agree a little	Neither agree nor disagree	Agree strongly
15	2022-04-01 10:58:55	2022-04-01 11:06:50	anonymous		Agree to Participate	2.5	Female	Disagree a little	Agree a little	Disagree strongly	Agree a little	Disagree strongly	Disagree a little	Disagree strongly	Agree a little	Disagree a little	Agree strongly	Agree strongly	Agree strongly	Disagree strongly	Disagree strongly	Agree strongly	Agree strongly	Disagree strongly	Disagree strongly	Agree strongly	Agree strongly	Disagree strongly	Disagree strongly	Agree strongly	Agree strongly	Disagree strongly	Agree strongly	Agree strongly	Agree strongly	Disagree strongly	Disagree strongly	Agree strongly	Agree strongly	Disagree strongly	Disagree strongly	Agree strongly	Agree strongly	Disagree strongly	Disagree strongly	Disagree strongly	Agree strongly	Disagree strongly	Agree strongly
16	2022-04-01 11:02:39	2022-04-01 12:37:21	anonymous		Agree to Participate	8.5	Male	Agree a little	Neither agree nor disagree	Disagree strongly	Agree strongly	Disagree strongly	Agree a little	Disagree a little	Agree strongly	Disagree a little	Agree strongly	Disagree a little	Disagree a little	Agree strongly	Disagree strongly	Disagree strongly	Disagree strongly	Disagree strongly	Neither agree nor disagree	Agree a little	Disagree strongly	Agree strongly	Disagree strongly	Disagree strongly	Disagree strongly	Disagree strongly	Neither agree nor disagree	Neither agree nor disagree	Disagree strongly	Agree a little	Disagree strongly	Disagree a little	Disagree a little	Disagree strongly	Neither agree nor disagree	Disagree strongly	Disagree a little	Agree a little	Disagree strongly	Disagree a little	Disagree a little	Disagree strongly	Neither agree nor disagree
17	2022-04-01 11:00:47	2022-04-01 12:37:29	anonymous		Agree to Participate	3	Female	Agree strongly	Disagree strongly	Neither agree nor disagree	Agree strongly	Disagree strongly	Disagree a little	Disagree strongly	Agree a little	Disagree a little	Agree strongly	Neither agree nor disagree	Agree a little	Disagree a little	Disagree strongly	Neither agree nor disagree	Agree a little	Agree a little	Neither agree nor disagree	Agree a little	Neither agree nor disagree	Disagree a little	Disagree strongly	Neither agree nor disagree	Agree a little	Neither agree nor disagree	Neither agree nor disagree	Agree strongly	Agree a little	Disagree strongly	Disagree strongly	Agree a little	Agree a little	Agree a little	Neither agree nor disagree	Agree strongly	Agree strongly	Disagree strongly	Disagree strongly	Agree strongly	Agree a little	Agree a little	Neither agree nor disagree
18	2022-04-01 10:59:52	2022-04-01 12:37:36	anonymous		Agree to Participate	1	Male	Agree a little	Agree a little	Agree a little	Disagree a little	Agree a little	Disagree a little	Disagree a little	Agree a little	Agree a little	Agree a little	Agree a little	Neither agree nor disagree	Agree a little	Disagree a little	Disagree a little	Disagree strongly	Disagree strongly	Neither agree nor disagree	Agree strongly	Agree a little	Disagree strongly	Disagree strongly	Neither agree nor disagree	Neither agree nor disagree	Disagree a little	Neither agree nor disagree	Neither agree nor disagree	Disagree a little	Agree a little	Agree a little	Disagree a little	Disagree strongly	Disagree strongly	Neither agree nor disagree	Neither agree nor disagree	Disagree a little	Neither agree nor disagree	Neither agree nor disagree	Disagree strongly	Disagree strongly	Disagree strongly	Neither agree nor disagree
19	2022-04-01 11:02:39	2022-04-01 12:38:01	anonymous		Agree to Participate	1	Male	Agree a little	Disagree a little	Agree strongly	Disagree a little	Disagree a little	Disagree a little	Neither agree nor disagree	Agree a little	Agree strongly	Agree strongly	Disagree a little	Neither agree nor disagree	Neither agree nor disagree	Agree a little	Agree strongly	Agree a little	Disagree a little	Neither agree nor disagree	Disagree a little	Disagree strongly	Neither agree nor disagree	Agree a little	Neither agree nor disagree	Disagree a little	Disagree strongly	Neither agree nor disagree	Disagree a little	Disagree strongly	Neither agree nor disagree	Agree strongly	Neither agree nor disagree	Neither agree nor disagree	Disagree strongly	Neither agree nor disagree	Disagree strongly	Neither agree nor disagree	Disagree a little	Agree strongly	Neither agree nor disagree	Neither agree nor disagree	Disagree strongly	Neither agree nor disagree
20	2022-04-01 11:02:40	2022-04-01 12:38:13	anonymous		Agree to Participate	1.5	Male	Agree a little	Disagree a little	Agree strongly	Agree a little	Neither agree nor disagree	Disagree a little	Disagree a little	Agree strongly	Neither agree nor disagree	Disagree a little	Agree a little	Disagree a little	Disagree a little	Agree a little	Agree a little	Agree a little	Neither agree nor disagree	Neither agree nor disagree	Disagree strongly	Neither agree nor disagree	Disagree a little	Disagree strongly	Disagree a little	Agree a little	Neither agree nor disagree	Neither agree nor disagree	Agree a little	Neither agree nor disagree	Disagree a little	Neither agree nor disagree	Agree a little	Agree a little	Neither agree nor disagree	Neither agree nor disagree	Disagree a little	Disagree a little	Disagree strongly	Disagree a little	Neither agree nor disagree	Neither agree nor disagree	Neither agree nor disagree	Neither agree nor disagree
21	2022-04-01 11:00:21	2022-04-01 12:38:14	anonymous		Agree to Participate	1	Male	Neither agree nor disagree	Agree strongly	Agree a little	Disagree a little	Disagree strongly	Agree strongly	Agree a little	Agree a little	Neither agree nor disagree	Agree strongly	Disagree a little	Agree a little	Disagree a little	Disagree a little	Agree a little	Agree a little	Neither agree nor disagree	Neither agree nor disagree	Disagree strongly	Agree a little	Disagree a little	Disagree strongly	Disagree a little	Neither agree nor disagree	Neither agree nor disagree	Neither agree nor disagree	Disagree strongly	Disagree a little	Agree a little	Agree a little	Neither agree nor disagree	Agree a little	Neither agree nor disagree	Neither agree nor disagree	Disagree a little	Disagree a little	Neither agree nor disagree	Neither agree nor disagree	Agree a little	Disagree a little	Disagree a little	Neither agree nor disagree
22	2022-04-01 11:02:38	2022-04-01 12:38:17	anonymous		Agree to Participate	2	Male	Disagree strongly	Disagree a little	Agree a little	Disagree a little	Disagree a little	Disagree a little	Agree strongly	Neither agree nor disagree	Agree strongly	Agree strongly	Disagree a little	Disagree a little	Agree a little	Disagree strongly	Disagree strongly	Disagree a little	Disagree strongly	Neither agree nor disagree	Disagree a little	Disagree a little	Agree a little	Disagree strongly	Disagree strongly	Disagree a little	Disagree strongly	Neither agree nor disagree	Disagree a little	Disagree a little	Agree a little	Disagree strongly	Disagree strongly	Neither agree nor disagree	Disagree strongly	Neither agree nor disagree	Disagree a little	Disagree a little	Agree a little	Disagree strongly	Disagree strongly	Disagree a little	Disagree strongly	Neither agree nor disagree
23	2022-04-01 11:19:24	2022-04-01 12:38:24	anonymous		Agree to Participate	15	Male	Agree a little	Disagree a little	Agree strongly	Agree a little	Disagree a little	Disagree a little	Agree a little	Disagree a little	Disagree a little	Agree a little	Disagree a little	Disagree strongly	Agree a little	Disagree a little	Disagree strongly	Disagree a little	Disagree strongly	Neither agree nor disagree	Neither agree nor disagree	Disagree a little	Neither agree nor disagree	Disagree a little	Disagree strongly	Neither agree nor disagree	Disagree strongly	Neither agree nor disagree	Neither agree nor disagree	Agree a little	Neither agree nor disagree	Disagree a little	Disagree a little	Disagree a little	Disagree strongly	Neither agree nor disagree	Neither agree nor disagree	Disagree a little	Neither agree nor disagree	Disagree a little	Disagree strongly	Disagree a little	Disagree strongly	Neither agree nor disagree
24	2022-04-01 11:02:30	2022-04-01 12:38:30	anonymous		Agree to Participate	0.5	Male	Agree a little	Disagree a little	Agree strongly	Agree strongly	Disagree a little	Agree a little	Disagree strongly	Neither agree nor disagree	Agree a little	Agree a little	Neither agree nor disagree	Agree a little	Disagree strongly	Disagree strongly	Agree a little	Disagree a little	Disagree strongly	Neither agree nor disagree	Disagree a little	Agree a little	Disagree a little	Disagree strongly	Agree a little	Disagree strongly	Disagree strongly	Neither agree nor disagree	Disagree strongly	Disagree a little	Disagree a little	Disagree strongly	Neither agree nor disagree	Disagree strongly	Disagree strongly	Neither agree nor disagree	Disagree strongly	Neither agree nor disagree	Disagree a little	Disagree strongly	Neither agree nor disagree	Disagree strongly	Disagree strongly	Neither agree nor disagree
25	2022-04-01 11:02:40	2022-04-01 12:39:17	anonymous		Agree to Participate	1	Male	Agree a little	Disagree strongly	Agree strongly	Agree a little	Disagree a little	Disagree a little	Disagree strongly	Agree a little	Disagree strongly	Agree strongly	Disagree a little	Neither agree nor disagree	Agree a little	Disagree strongly	Disagree a little	Disagree a little	Agree strongly	Neither agree nor disagree	Agree a little	Agree a little	Disagree a little	Agree strongly	Disagree a little	Agree a little	Disagree strongly	Neither agree nor disagree	Disagree a little	Neither agree nor disagree	Neither agree nor disagree	Disagree a little	Agree a little	Disagree a little	Agree a little	Neither agree nor disagree	Disagree strongly	Neither agree nor disagree	Neither agree nor disagree	Agree strongly	Neither agree nor disagree	Disagree strongly	Agree a little	Neither agree nor disagree
26	2022-04-01 11:01:51	2022-04-01 12:40:34	anonymous		Agree to Participate	25	Male	Agree a little	Disagree a little	Neither agree nor disagree	Agree strongly	Disagree strongly	Disagree a little	Disagree a little	Agree a little	Disagree strongly	Agree strongly	Neither agree nor disagree	Agree a little	Disagree a little	Disagree a little	Disagree a little	Agree a little	Disagree a little	Neither agree nor disagree	Neither agree nor disagree	Disagree a little	Disagree a little	Disagree strongly	Agree a little	Neither agree nor disagree	Disagree a little	Neither agree nor disagree	Agree a little	Agree a little	Disagree strongly	Disagree a little	Agree a little	Agree a little	Disagree a little	Neither agree nor disagree	Agree a little	Agree a little	Disagree a little	Disagree strongly	Agree strongly	Agree a little	Disagree a little	Neither agree nor disagree
27	2022-04-08 09:22:07	2022-04-08 10:48:25	anonymous		Agree to Participate	3.5	Male	Agree a little	Agree a little	Agree a little	Agree strongly	Disagree strongly	Agree strongly	Neither agree nor disagree	Neither agree nor disagree	Disagree strongly	Agree strongly	Disagree a little	Disagree a little	Agree a little	Agree a little	Disagree a little	Disagree a little	Disagree a little	Neither agree nor disagree	Agree a little	Agree a little	Disagree a little	Agree a little	Agree a little	Agree a little	Disagree a little	Neither agree nor disagree	Agree a little	Agree a little	Disagree a little	Agree a little	Agree a little	Neither agree nor disagree	Neither agree nor disagree	Neither agree nor disagree	Disagree a little	Neither agree nor disagree	Disagree a little	Neither agree nor disagree	Neither agree nor disagree	Neither agree nor disagree	Disagree a little	Neither agree nor disagree
28	2022-04-08 09:22:45	2022-04-08 10:49:07	anonymous		Agree to Participate	0.5	Female	Disagree a little	Disagree a little	Disagree a little	Agree a little	Agree a little	Disagree a little	Disagree a little	Agree a little	Disagree a little	Disagree a little	Disagree a little	Disagree a little	Disagree a little	Disagree a little	Disagree a little	Disagree a little	Disagree strongly	Neither agree nor disagree	Agree a little	Agree a little	Disagree a little	Disagree a little	Agree a little	Agree a little	Disagree strongly	Neither agree nor disagree	Disagree a little	Disagree a little	Disagree a little	Agree a little	Disagree strongly	Disagree a little	Disagree strongly	Neither agree nor disagree	Disagree a little	Agree a little	Disagree a little	Disagree strongly	Agree a little	Disagree a little	Disagree strongly	Neither agree nor disagree
29	2022-04-08 09:22:09	2022-04-08 10:49:16	anonymous		Agree to Participate	0.5	Male	Agree a little	Disagree a little	Agree strongly	Neither agree nor disagree	Disagree strongly	Neither agree nor disagree	Agree a little	Agree a little	Disagree a little	Neither agree nor disagree	Disagree strongly	Disagree strongly	Neither agree nor disagree	Disagree a little	Disagree strongly	Disagree strongly	Disagree strongly	Neither agree nor disagree	Neither agree nor disagree	Neither agree nor disagree	Neither agree nor disagree	Disagree a little	Neither agree nor disagree	Neither agree nor disagree	Disagree a little	Neither agree nor disagree	Neither agree nor disagree	Neither agree nor disagree	Neither agree nor disagree	Disagree a little	Neither agree nor disagree	Neither agree nor disagree	Disagree a little	Neither agree nor disagree	Neither agree nor disagree	Neither agree nor disagree	Neither agree nor disagree	Disagree a little	Neither agree nor disagree	Neither agree nor disagree	Disagree a little	Neither agree nor disagree
30	2022-04-08 09:28:00	2022-04-08 10:49:17	anonymous		Agree to Participate	0.5	Male	Neither agree nor disagree	Disagree a little	Disagree a little	Disagree a little	Disagree strongly	Neither agree nor disagree	Disagree a little	Neither agree nor disagree	Agree a little	Agree a little	Disagree strongly	Disagree a little	Agree a little	Neither agree nor disagree	Disagree a little	Disagree a little	Disagree strongly	Neither agree nor disagree	Agree a little	Neither agree nor disagree	Neither agree nor disagree	Disagree a little	Neither agree nor disagree	Agree a little	Disagree a little	Neither agree nor disagree	Disagree strongly	Disagree a little	Neither agree nor disagree	Neither agree nor disagree	Disagree strongly	Disagree a little	Disagree strongly	Neither agree nor disagree	Neither agree nor disagree	Disagree strongly	Disagree a little	Neither agree nor disagree	Disagree a little	Disagree a little	Disagree a little	Neither agree nor disagree
31	2022-04-08 09:22:18	2022-04-08 10:49:20	anonymous		Agree to Participate	5	Male	Agree a little	Neither agree nor disagree	Agree a little	Neither agree nor disagree	Agree strongly	Neither agree nor disagree	Disagree a little	Neither agree nor disagree	Neither agree nor disagree	Disagree a little	Disagree strongly	Disagree strongly	Agree a little	Agree a little	Disagree a little	Disagree a little	Disagree strongly	Neither agree nor disagree	Disagree strongly	Disagree strongly	Agree strongly	Agree strongly	Disagree strongly	Disagree strongly	Disagree strongly	Neither agree nor disagree	Disagree strongly	Disagree strongly	Agree strongly	Agree strongly	Disagree strongly	Disagree strongly	Disagree strongly	Neither agree nor disagree	Agree a little	Agree a little	Disagree a little	Disagree a little	Neither agree nor disagree	Disagree a little	Disagree strongly	Neither agree nor disagree
32	2022-04-08 09:22:50	2022-04-08 10:50:03	anonymous		Agree to Participate	0	Male	Neither agree nor disagree	Disagree a little	Disagree a little	Neither agree nor disagree	Disagree a little	Disagree strongly	Neither agree nor disagree	Agree strongly	Neither agree nor disagree	Disagree a little	Agree a little	Agree a little	Disagree strongly	Disagree strongly	Neither agree nor disagree	Agree a little	Disagree strongly	Neither agree nor disagree	Agree a little	Agree a little	Disagree strongly	Disagree strongly	Neither agree nor disagree	Agree a little	Disagree strongly	Neither agree nor disagree	Agree strongly	Agree a little	Disagree strongly	Disagree strongly	Agree a little	Agree a little	Disagree strongly	Neither agree nor disagree	Agree a little	Agree a little	Disagree strongly	Disagree strongly	Neither agree nor disagree	Agree a little	Disagree strongly	Neither agree nor disagree
33	2022-04-08 09:27:33	2022-04-08 10:50:06	anonymous		Agree to Participate	0.5	Male	Disagree a little	Agree a little	Agree a little	Agree a little	Agree a little	Disagree a little	Disagree a little	Disagree a little	Disagree a little	Disagree a little	Agree a little	Agree a little	Neither agree nor disagree	Disagree a little	Neither agree nor disagree	Agree a little	Disagree strongly	Neither agree nor disagree	Agree a little	Agree strongly	Disagree a little	Disagree strongly	Agree a little	Agree a little	Disagree strongly	Neither agree nor disagree	Disagree a little	Neither agree nor disagree	Neither agree nor disagree	Disagree a little	Neither agree nor disagree	Disagree a little	Disagree strongly	Neither agree nor disagree	Disagree a little	Disagree a little	Neither agree nor disagree	Disagree a little	Disagree a little	Disagree a little	Disagree strongly	Neither agree nor disagree
34	2022-04-08 09:22:09	2022-04-08 10:50:24	anonymous		Agree to Participate	1.5	Female	Agree a little	Agree strongly	Disagree a little	Disagree strongly	Agree strongly	Agree strongly	Disagree a little	Neither agree nor disagree	Agree strongly	Agree strongly	Agree a little	Agree a little	Neither agree nor disagree	Neither agree nor disagree	Neither agree nor disagree	Agree a little	Neither agree nor disagree	Neither agree nor disagree	Neither agree nor disagree	Agree a little	Neither agree nor disagree	Neither agree nor disagree	Neither agree nor disagree	Agree a little	Neither agree nor disagree	Neither agree nor disagree	Agree a little	Agree a little	Disagree a little	Disagree a little	Neither agree nor disagree	Agree a little	Neither agree nor disagree	Neither agree nor disagree	Agree a little	Agree a little	Neither agree nor disagree	Neither agree nor disagree	Neither agree nor disagree	Agree a little	Neither agree nor disagree	Neither agree nor disagree
35	2022-04-08 09:45:32	2022-04-08 10:50:32	anonymous		Agree to Participate	0.5	Male	Agree a little	Disagree a little	Agree a little	Agree a little	Agree a little	Disagree a little	Agree a little	Agree a little	Agree a little	Disagree a little	Agree a little	Disagree a little	Agree a little	Agree a little	Disagree a little	Disagree a little	Disagree strongly	Neither agree nor disagree	Neither agree nor disagree	Neither agree nor disagree	Agree a little	Agree a little	Disagree strongly	Disagree strongly	Disagree strongly	Neither agree nor disagree	Disagree a little	Disagree a little	Agree a little	Agree a little	Disagree strongly	Disagree strongly	Disagree strongly	Neither agree nor disagree	Disagree a little	Disagree a little	Agree a little	Agree a little	Disagree a little	Disagree a little	Disagree strongly	Neither agree nor disagree
36	2022-04-08 09:24:39	2022-04-08 10:50:34	anonymous		Agree to Participate	0.5	Male	Neither agree nor disagree	Disagree a little	Agree strongly	Agree strongly	Neither agree nor disagree	Neither agree nor disagree	Neither agree nor disagree	Agree strongly	Agree a little	Disagree a little	Disagree strongly	Disagree a little	Agree a little	Agree a little	Disagree strongly	Disagree a little	Neither agree nor disagree	Neither agree nor disagree	Disagree strongly	Disagree a little	Neither agree nor disagree	Neither agree nor disagree	Disagree strongly	Disagree a little	Neither agree nor disagree	Neither agree nor disagree	Disagree strongly	Disagree strongly	Agree a little	Agree a little	Disagree strongly	Disagree a little	Neither agree nor disagree	Neither agree nor disagree	Disagree strongly	Disagree strongly	Agree strongly	Agree strongly	Disagree strongly	Disagree strongly	Neither agree nor disagree	Neither agree nor disagree
37	2022-04-08 09:31:31	2022-04-08 10:50:34	anonymous		Agree to Participate	2	Male	Disagree a little	Agree a little	Agree a little	Agree strongly	Agree a little	Agree a little	Disagree a little	Agree a little	Disagree a little	Disagree strongly	Disagree a little	Disagree a little	Agree a little	Neither agree nor disagree	Disagree a little	Agree a little	Disagree a little	Neither agree nor disagree	Agree a little	Agree a little	Disagree a little	Disagree a little	Disagree a little	Neither agree nor disagree	Disagree a little	Neither agree nor disagree	Agree a little	Agree a little	Disagree a little	Agree a little	Disagree strongly	Agree a little	Disagree strongly	Neither agree nor disagree	Agree a little	Agree a little	Disagree a little	Agree a little	Disagree a little	Disagree a little	Disagree a little	Neither agree nor disagree
38	2022-04-08 09:22:33	2022-04-08 10:50:50	anonymous		Agree to Participate	0.5	Male	Agree a little	Agree a little	Agree strongly	Disagree a little	Agree a little	Disagree strongly	Disagree a little	Agree a little	Agree strongly	Disagree a little	Neither agree nor disagree	Agree a little	Disagree strongly	Disagree strongly	Agree a little	Neither agree nor disagree	Disagree strongly	Neither agree nor disagree	Disagree a little	Agree a little	Disagree strongly	Disagree strongly	Neither agree nor disagree	Neither agree nor disagree	Disagree strongly	Neither agree nor disagree	Disagree a little	Agree a little	Disagree strongly	Disagree strongly	Neither agree nor disagree	Agree a little	Disagree strongly	Neither agree nor disagree	Disagree strongly	Disagree a little	Disagree a little	Disagree strongly	Neither agree nor disagree	Disagree a little	Disagree strongly	Neither agree nor disagree
39	2022-04-08 09:25:01	2022-04-08 10:51:03	anonymous		Agree to Participate	2.5	Female	Disagree strongly	Agree a little	Disagree strongly	Agree strongly	Disagree strongly	Agree a little	Disagree strongly	Agree a little	Disagree strongly	Agree strongly	Agree strongly	Agree a little	Disagree strongly	Disagree strongly	Agree a little	Agree strongly	Disagree strongly	Neither agree nor disagree	Neither agree nor disagree	Disagree a little	Agree a little	Agree a little	Disagree a little	Disagree a little	Disagree strongly	Neither agree nor disagree	Agree a little	Agree a little	Disagree strongly	Disagree strongly	Agree a little	Agree a little	Disagree strongly	Neither agree nor disagree	Disagree strongly	Disagree strongly	Agree strongly	Agree strongly	Disagree strongly	Disagree strongly	Disagree strongly	Neither agree nor disagree
40	2022-04-08 09:22:16	2022-04-08 10:51:26	anonymous		Agree to Participate	1.5	Male	Disagree a little	Agree a little	Agree strongly	Agree a little	Agree a little	Agree a little	Disagree a little	Agree a little	Disagree strongly	Neither agree nor disagree	Agree a little	Neither agree nor disagree	Disagree strongly	Disagree strongly	Agree a little	Agree a little	Disagree strongly	Disagree strongly	Agree a little	Disagree a little	Disagree strongly	Disagree strongly	Neither agree nor disagree	Agree a little	Disagree strongly	Disagree strongly	Neither agree nor disagree	Disagree a little	Disagree strongly	Disagree strongly	Agree a little	Disagree a little	Disagree strongly	Disagree strongly	Neither agree nor disagree	Disagree a little	Disagree strongly	Disagree strongly	Disagree a little	Neither agree nor disagree	Disagree strongly	Disagree strongly
41	2022-04-08 09:27:13	2022-04-08 10:51:30	anonymous		Agree to Participate	1	Male	Agree a little	Neither agree nor disagree	Agree a little	Neither agree nor disagree	Disagree a little	Disagree a little	Disagree a little	Disagree a little	Agree a little	Agree a little	Neither agree nor disagree	Neither agree nor disagree	Agree a little	Agree a little	Neither agree nor disagree	Neither agree nor disagree	Disagree strongly	Neither agree nor disagree	Neither agree nor disagree	Neither agree nor disagree	Neither agree nor disagree	Agree a little	Disagree a little	Neither agree nor disagree	Disagree strongly	Neither agree nor disagree	Disagree a little	Disagree a little	Neither agree nor disagree	Agree a little	Disagree a little	Disagree a little	Disagree a little	Neither agree nor disagree	Disagree a little	Agree a little	Neither agree nor disagree	Neither agree nor disagree	Neither agree nor disagree	Agree a little	Disagree a little	Neither agree nor disagree
42	2022-04-08 09:22:08	2022-04-08 10:51:30	anonymous		Agree to Participate	5	Male	Neither agree nor disagree	Agree a little	Agree strongly	Disagree strongly	Agree a little	Agree a little	Disagree a little	Neither agree nor disagree	Agree strongly	Agree a little	Agree a little	Disagree a little	Disagree a little	Disagree a little	Disagree a little	Neither agree nor disagree	Disagree a little	Neither agree nor disagree	Agree a little	Disagree a little	Disagree a little	Disagree a little	Neither agree nor disagree	Neither agree nor disagree	Disagree a little	Neither agree nor disagree	Agree a little	Disagree a little	Disagree a little	Disagree a little	Neither agree nor disagree	Neither agree nor disagree	Disagree a little	Neither agree nor disagree	Disagree a little	Disagree a little	Neither agree nor disagree	Neither agree nor disagree	Neither agree nor disagree	Disagree a little	Disagree a little	Neither agree nor disagree
43	2022-04-08 11:20:46	2022-04-08 12:38:59	anonymous		Agree to Participate	0.5	Male	Agree a little	Disagree a little	Agree strongly	Agree a little	Disagree a little	Agree a little	Disagree strongly	Neither agree nor disagree	Agree a little	Neither agree nor disagree	Agree a little	Agree a little	Disagree a little	Agree a little	Neither agree nor disagree	Agree a little	Disagree strongly	Neither agree nor disagree	Neither agree nor disagree	Agree a little	Disagree a little	Neither agree nor disagree	Neither agree nor disagree	Agree a little	Disagree strongly	Neither agree nor disagree	Disagree a little	Agree a little	Neither agree nor disagree	Neither agree nor disagree	Neither agree nor disagree	Agree a little	Disagree strongly	Neither agree nor disagree	Disagree strongly	Disagree a little	Agree a little	Agree a little	Neither agree nor disagree	Disagree a little	Disagree strongly	Neither agree nor disagree
44	2022-04-08 11:09:42	2022-04-08 12:39:04	anonymous		Agree to Participate	3	Female	Agree strongly	Disagree strongly	Agree a little	Agree strongly	Disagree strongly	Disagree a little	Disagree strongly	Agree a little	Disagree a little	Agree strongly	Agree a little	Agree a little	Disagree a little	Disagree a little	Neither agree nor disagree	Neither agree nor disagree	Neither agree nor disagree	Disagree strongly	Agree strongly	Agree strongly	Disagree strongly	Disagree strongly	Agree a little	Agree a little	Agree a little	Agree strongly	Agree a little	Agree strongly	Disagree strongly	Disagree strongly	Agree strongly	Agree a little	Agree a little	Disagree strongly	Agree a little	Agree a little	Disagree strongly	Disagree strongly	Agree a little	Agree a little	Neither agree nor disagree	Agree strongly
45	2022-04-08 11:04:23	2022-04-08 12:39:15	anonymous		Agree to Participate	1.5	Male	Neither agree nor disagree	Agree strongly	Agree a little	Agree a little	Disagree strongly	Agree a little	Agree a little	Neither agree nor disagree	Disagree a little	Agree strongly	Agree a little	Disagree a little	Agree a little	Disagree strongly	Disagree a little	Disagree a little	Neither agree nor disagree	Agree strongly	Agree a little	Agree a little	Disagree a little	Disagree strongly	Agree a little	Agree a little	Neither agree nor disagree	Disagree strongly	Agree a little	Neither agree nor disagree	Disagree a little	Disagree strongly	Agree a little	Agree a little	Disagree a little	Agree strongly	Neither agree nor disagree	Neither agree nor disagree	Disagree a little	Disagree a little	Agree a little	Agree a little	Neither agree nor disagree	Disagree strongly
46	2022-04-08 11:17:32	2022-04-08 12:39:19	anonymous		Agree to Participate	8.5	Male	Agree a little	Agree a little	Disagree strongly	Agree strongly	Disagree strongly	Neither agree nor disagree	Disagree a little	Agree strongly	Disagree strongly	Agree strongly	Disagree strongly	Disagree strongly	Agree a little	Disagree strongly	Disagree strongly	Disagree strongly	Disagree strongly	Agree strongly	Agree a little	Agree a little	Agree a little	Disagree strongly	Neither agree nor disagree	Agree a little	Disagree strongly	Disagree strongly	Disagree a little	Agree a little	Agree a little	Disagree strongly	Neither agree nor disagree	Neither agree nor disagree	Disagree strongly	Agree strongly	Neither agree nor disagree	Agree a little	Disagree a little	Disagree strongly	Neither agree nor disagree	Agree a little	Disagree strongly	Disagree strongly
47	2022-04-08 11:08:43	2022-04-08 12:39:25	anonymous		Agree to Participate	15	Male	Agree a little	Disagree a little	Agree strongly	Agree a little	Disagree a little	Disagree a little	Agree a little	Disagree a little	Disagree strongly	Agree a little	Neither agree nor disagree	Agree a little	Disagree a little	Disagree strongly	Neither agree nor disagree	Agree a little	Disagree a little	Agree strongly	Agree a little	Agree a little	Disagree a little	Disagree strongly	Agree a little	Agree a little	Agree a little	Disagree strongly	Agree a little	Neither agree nor disagree	Disagree strongly	Disagree a little	Neither agree nor disagree	Neither agree nor disagree	Disagree a little	Agree strongly	Neither agree nor disagree	Neither agree nor disagree	Disagree a little	Disagree a little	Disagree a little	Neither agree nor disagree	Disagree strongly	Disagree strongly
48	2022-04-08 11:08:44	2022-04-08 12:39:32	anonymous		Agree to Participate	1.5	Male	Neither agree nor disagree	Neither agree nor disagree	Agree a little	Neither agree nor disagree	Neither agree nor disagree	Disagree a little	Neither agree nor disagree	Agree a little	Disagree a little	Disagree a little	Neither agree nor disagree	Agree a little	Neither agree nor disagree	Agree a little	Agree a little	Neither agree nor disagree	Disagree a little	Disagree strongly	Neither agree nor disagree	Agree a little	Neither agree nor disagree	Neither agree nor disagree	Agree a little	Disagree a little	Disagree a little	Disagree strongly	Disagree a little	Agree a little	Neither agree nor disagree	Disagree a little	Agree a little	Disagree a little	Disagree a little	Disagree strongly	Disagree a little	Disagree a little	Neither agree nor disagree	Disagree strongly	Disagree a little	Neither agree nor disagree	Neither agree nor disagree	Agree strongly
49	2022-04-08 11:09:39	2022-04-08 12:39:40	anonymous		Agree to Participate	1	Male	Neither agree nor disagree	Agree a little	Neither agree nor disagree	Disagree a little	Agree a little	Neither agree nor disagree	Disagree a little	Agree a little	Agree a little	Agree a little	Agree a little	Neither agree nor disagree	Neither agree nor disagree	Neither agree nor disagree	Neither agree nor disagree	Neither agree nor disagree	Agree a little	Disagree strongly	Agree a little	Agree strongly	Disagree a little	Agree a little	Neither agree nor disagree	Agree a little	Neither agree nor disagree	Agree strongly	Neither agree nor disagree	Agree a little	Disagree strongly	Disagree strongly	Neither agree nor disagree	Agree a little	Disagree a little	Disagree strongly	Neither agree nor disagree	Neither agree nor disagree	Neither agree nor disagree	Neither agree nor disagree	Disagree a little	Disagree strongly	Disagree strongly	Agree strongly
50	2022-04-08 12:17:45	2022-04-08 12:40:02	anonymous		Agree to Participate	2	Male	Disagree strongly	Disagree a little	Agree a little	Disagree a little	Disagree strongly	Disagree a little	Agree a little	Neither agree nor disagree	Agree a little	Agree strongly	Neither agree nor disagree	Neither agree nor disagree	Disagree a little	Disagree strongly	Disagree a little	Neither agree nor disagree	Disagree strongly	Disagree strongly	Agree a little	Neither agree nor disagree	Disagree a little	Disagree strongly	Disagree a little	Agree a little	Disagree strongly	Agree strongly	Disagree a little	Neither agree nor disagree	Agree a little	Disagree strongly	Disagree a little	Neither agree nor disagree	Disagree strongly	Disagree strongly	Neither agree nor disagree	Agree a little	Disagree a little	Disagree strongly	Neither agree nor disagree	Agree a little	Disagree strongly	Agree strongly
51	2022-04-08 11:37:27	2022-04-08 12:41:00	anonymous		Agree to Participate	1	Male	Neither agree nor disagree	Disagree strongly	Agree strongly	Agree a little	Agree a little	Disagree a little	Disagree strongly	Agree a little	Disagree a little	Agree strongly	Neither agree nor disagree	Neither agree nor disagree	Neither agree nor disagree	Neither agree nor disagree	Neither agree nor disagree	Neither agree nor disagree	Neither agree nor disagree	Neither agree nor disagree	Agree a little	Agree a little	Disagree strongly	Disagree strongly	Agree strongly	Agree strongly	Disagree a little	Neither agree nor disagree	Neither agree nor disagree	Agree a little	Disagree a little	Disagree strongly	Agree a little	Agree a little	Neither agree nor disagree	Neither agree nor disagree	Disagree a little	Agree a little	Disagree a little	Disagree strongly	Agree a little	Agree a little	Disagree strongly	Neither agree nor disagree
52	2022-04-08 11:09:31	2022-04-08 12:42:40	anonymous		Agree to Participate	2.5	Male	Disagree a little	Disagree a little	Neither agree nor disagree	Agree strongly	Disagree strongly	Neither agree nor disagree	Disagree a little	Agree a little	Disagree strongly	Agree a little	Agree a little	Neither agree nor disagree	Disagree a little	Disagree strongly	Agree a little	Agree a little	Neither agree nor disagree	Agree strongly	Agree a little	Agree a little	Disagree strongly	Disagree strongly	Agree a little	Agree a little	Neither agree nor disagree	Disagree strongly	Neither agree nor disagree	Neither agree nor disagree	Disagree a little	Disagree strongly	Agree a little	Disagree a little	Neither agree nor disagree	Agree strongly	Agree a little	Agree a little	Disagree strongly	Disagree strongly	Agree a little	Agree a little	Neither agree nor disagree	Disagree strongly
53	2022-04-08 12:47:39	2022-04-08 12:50:03	anonymous		Agree to Participate	1	Male	Agree a little	Neither agree nor disagree	Agree strongly	Disagree a little	Disagree a little	Disagree strongly	Neither agree nor disagree	Agree a little	Agree strongly	Agree strongly	Neither agree nor disagree	Agree a little	Disagree a little	Neither agree nor disagree	Neither agree nor disagree	Agree a little	Disagree a little	Disagree strongly	Disagree a little	Disagree a little	Neither agree nor disagree	Agree a little	Disagree a little	Disagree a little	Disagree strongly	Agree strongly	Neither agree nor disagree	Neither agree nor disagree	Neither agree nor disagree	Disagree a little	Neither agree nor disagree	Disagree a little	Neither agree nor disagree	Disagree strongly	Agree a little	Agree strongly	Neither agree nor disagree	Neither agree nor disagree	Agree a little	Agree a little	Neither agree nor disagree	Agree strongly
54	2022-05-13 09:39:43	2022-05-13 10:48:03	anonymous		Agree to Participate	0.5	Male	Agree a little	Disagree a little	Agree a little	Agree a little	Neither agree nor disagree	Disagree a little	Neither agree nor disagree	Neither agree nor disagree	Disagree a little	Neither agree nor disagree	Disagree a little	Disagree a little	Agree a little	Agree a little	Disagree a little	Disagree a little	Disagree a little	Agree strongly	Disagree a little	Disagree a little	Agree a little	Agree a little	Disagree a little	Disagree a little	Disagree a little	Disagree strongly	Disagree a little	Disagree a little	Agree a little	Agree a little	Disagree a little	Disagree a little	Disagree a little	Agree strongly	Disagree a little	Disagree a little	Agree a little	Agree a little	Disagree a little	Disagree a little	Disagree a little	Disagree strongly
55	2022-05-13 09:39:42	2022-05-13 10:48:09	anonymous		Agree to Participate	1	Male	Agree a little	Disagree a little	Agree strongly	Agree a little	Agree strongly	Disagree a little	Neither agree nor disagree	Agree a little	Disagree a little	Neither agree nor disagree	Agree a little	Agree a little	Disagree strongly	Disagree a little	Neither agree nor disagree	Neither agree nor disagree	Disagree strongly	Agree strongly	Agree strongly	Agree strongly	Disagree strongly	Disagree strongly	Agree a little	Agree a little	Disagree strongly	Disagree strongly	Neither agree nor disagree	Disagree a little	Disagree strongly	Disagree a little	Neither agree nor disagree	Neither agree nor disagree	Disagree strongly	Agree strongly	Neither agree nor disagree	Agree a little	Disagree strongly	Neither agree nor disagree	Disagree a little	Disagree a little	Disagree strongly	Disagree strongly
56	2022-05-13 10:25:13	2022-05-13 10:48:13	anonymous		Agree to Participate	2	Male	Agree a little	Agree strongly	Agree a little	Agree a little	Agree a little	Agree a little	Disagree a little	Agree a little	Disagree a little	Neither agree nor disagree	Agree a little	Agree a little	Disagree strongly	Disagree strongly	Neither agree nor disagree	Agree a little	Disagree a little	Disagree strongly	Agree a little	Agree a little	Disagree strongly	Disagree strongly	Agree a little	Agree a little	Disagree strongly	Agree strongly	Agree strongly	Agree a little	Disagree strongly	Disagree strongly	Neither agree nor disagree	Neither agree nor disagree	Disagree strongly	Disagree strongly	Agree strongly	Agree strongly	Disagree strongly	Disagree strongly	Agree a little	Neither agree nor disagree	Disagree strongly	Agree strongly
57	2022-05-13 09:39:40	2022-05-13 10:48:14	anonymous		Agree to Participate	1	Female	Disagree a little	Agree a little	Agree a little	Agree a little	Disagree a little	Agree a little	Disagree a little	Agree a little	Agree strongly	Disagree a little	Agree strongly	Agree a little	Disagree a little	Agree a little	Neither agree nor disagree	Agree a little	Disagree strongly	Disagree strongly	Disagree a little	Disagree a little	Agree a little	Agree strongly	Neither agree nor disagree	Disagree a little	Disagree strongly	Agree strongly	Agree a little	Agree a little	Disagree a little	Disagree a little	Neither agree nor disagree	Agree a little	Disagree a little	Disagree strongly	Agree a little	Agree a little	Disagree a little	Disagree a little	Agree a little	Disagree a little	Disagree strongly	Agree strongly
58	2022-05-13 09:39:55	2022-05-13 10:48:16	anonymous		Agree to Participate	0.55	Prefer not to say	Neither agree nor disagree	Disagree strongly	Agree a little	Disagree a little	Agree a little	Neither agree nor disagree	Disagree a little	Neither agree nor disagree	Disagree a little	Agree a little	Agree a little	Neither agree nor disagree	Disagree a little	Neither agree nor disagree	Neither agree nor disagree	Neither agree nor disagree	Disagree strongly	Agree strongly	Disagree a little	Disagree a little	Agree a little	Disagree a little	Agree a little	Neither agree nor disagree	Disagree strongly	Disagree strongly	Agree a little	Neither agree nor disagree	Disagree a little	Agree a little	Neither agree nor disagree	Agree a little	Disagree a little	Agree strongly	Agree strongly	Agree strongly	Neither agree nor disagree	Agree a little	Agree a little	Neither agree nor disagree	Agree a little	Disagree strongly
59	2022-05-13 09:39:45	2022-05-13 10:48:50	anonymous		Agree to Participate	5	Male	Agree a little	Agree a little	Agree strongly	Disagree strongly	Neither agree nor disagree	Agree a little	Disagree a little	Neither agree nor disagree	Agree a little	Agree a little	Agree a little	Neither agree nor disagree	Disagree a little	Neither agree nor disagree	Neither agree nor disagree	Agree a little	Disagree a little	Agree strongly	Agree a little	Agree a little	Disagree a little	Disagree strongly	Agree a little	Agree a little	Disagree a little	Disagree strongly	Agree a little	Agree a little	Disagree strongly	Disagree strongly	Neither agree nor disagree	Agree a little	Neither agree nor disagree	Agree strongly	Agree a little	Agree a little	Disagree strongly	Disagree strongly	Agree a little	Neither agree nor disagree	Disagree a little	Disagree strongly
60	2022-05-13 09:39:34	2022-05-13 10:48:59	anonymous		Agree to Participate	5	Male	Agree a little	Disagree a little	Neither agree nor disagree	Neither agree nor disagree	Disagree a little	Disagree strongly	Neither agree nor disagree	Agree strongly	Neither agree nor disagree	Disagree a little	Neither agree nor disagree	Disagree a little	Neither agree nor disagree	Disagree strongly	Neither agree nor disagree	Neither agree nor disagree	Disagree strongly	Disagree strongly	Agree a little	Neither agree nor disagree	Disagree strongly	Disagree strongly	Neither agree nor disagree	Agree a little	Disagree strongly	Agree strongly	Agree a little	Agree a little	Disagree a little	Disagree strongly	Neither agree nor disagree	Agree a little	Disagree strongly	Disagree strongly	Agree strongly	Agree strongly	Disagree strongly	Disagree strongly	Agree a little	Agree a little	Disagree strongly	Agree strongly
61	2022-05-13 09:40:13	2022-05-13 10:49:00	anonymous		Agree to Participate	2	Male	Agree a little	Disagree a little	Agree strongly	Agree a little	Agree a little	Disagree a little	Disagree a little	Agree a little	Agree a little	Disagree a little	Agree a little	Neither agree nor disagree	Disagree a little	Disagree strongly	Disagree a little	Agree a little	Disagree strongly	Disagree strongly	Agree a little	Agree a little	Disagree a little	Disagree a little	Agree a little	Agree a little	Disagree a little	Agree strongly	Agree a little	Agree a little	Disagree a little	Disagree a little	Disagree a little	Agree a little	Disagree a little	Disagree strongly	Agree a little	Agree a little	Disagree a little	Disagree a little	Disagree a little	Agree a little	Disagree a little	Agree strongly
62	2022-05-13 09:39:37	2022-05-13 10:49:01	anonymous		Agree to Participate	1.5	Male	Agree a little	Neither agree nor disagree	Agree a little	Agree a little	Disagree strongly	Agree a little	Disagree strongly	Neither agree nor disagree	Agree a little	Agree strongly	Neither agree nor disagree	Neither agree nor disagree	Neither agree nor disagree	Disagree strongly	Neither agree nor disagree	Neither agree nor disagree	Neither agree nor disagree	Disagree strongly	Neither agree nor disagree	Neither agree nor disagree	Disagree a little	Disagree strongly	Neither agree nor disagree	Neither agree nor disagree	Neither agree nor disagree	Agree strongly	Neither agree nor disagree	Neither agree nor disagree	Disagree a little	Disagree strongly	Neither agree nor disagree	Neither agree nor disagree	Neither agree nor disagree	Disagree strongly	Agree a little	Disagree a little	Agree a little	Disagree a little	Agree a little	Disagree a little	Agree a little	Agree strongly
63	2022-05-13 09:39:35	2022-05-13 10:49:04	anonymous		Agree to Participate	1	Male	Neither agree nor disagree	Disagree a little	Agree a little	Neither agree nor disagree	Agree a little	Agree a little	Disagree a little	Agree a little	Agree a little	Disagree strongly	Neither agree nor disagree	Neither agree nor disagree	Disagree a little	Agree a little	Neither agree nor disagree	Agree a little	Neither agree nor disagree	Disagree strongly	Agree a little	Agree a little	Disagree a little	Neither agree nor disagree	Neither agree nor disagree	Agree a little	Neither agree nor disagree	Agree strongly	Neither agree nor disagree	Agree a little	Neither agree nor disagree	Agree a little	Disagree a little	Agree a little	Neither agree nor disagree	Disagree strongly	Disagree a little	Disagree a little	Neither agree nor disagree	Agree a little	Disagree a little	Neither agree nor disagree	Disagree strongly	Agree strongly
64	2022-05-13 09:40:36	2022-05-13 10:49:04	anonymous		Agree to Participate	15	Female	Agree a little	Agree strongly	Disagree a little	Disagree strongly	Agree strongly	Agree strongly	Disagree a little	Agree a little	Agree strongly	Agree strongly	Agree a little	Agree a little	Disagree a little	Disagree a little	Agree a little	Neither agree nor disagree	Neither agree nor disagree	Disagree strongly	Neither agree nor disagree	Disagree a little	Agree a little	Disagree a little	Disagree a little	Neither agree nor disagree	Neither agree nor disagree	Agree strongly	Agree a little	Neither agree nor disagree	Neither agree nor disagree	Disagree a little	Neither agree nor disagree	Neither agree nor disagree	Disagree a little	Disagree strongly	Agree a little	Disagree a little	Agree a little	Disagree a little	Neither agree nor disagree	Neither agree nor disagree	Disagree a little	Agree strongly
65	2022-05-13 09:40:34	2022-05-13 10:49:05	anonymous		Agree to Participate	2.5	Female	Disagree strongly	Agree strongly	Disagree strongly	Agree a little	Disagree strongly	Agree a little	Disagree strongly	Agree strongly	Disagree a little	Agree strongly	Neither agree nor disagree	Neither agree nor disagree	Neither agree nor disagree	Disagree strongly	Disagree strongly	Disagree strongly	Disagree strongly	Agree strongly	Disagree strongly	Disagree strongly	Agree strongly	Agree strongly	Disagree strongly	Disagree strongly	Disagree strongly	Disagree strongly	Disagree strongly	Disagree strongly	Agree strongly	Agree a little	Disagree strongly	Disagree strongly	Disagree strongly	Agree strongly	Disagree strongly	Disagree strongly	Agree strongly	Agree strongly	Agree a little	Neither agree nor disagree	Disagree strongly	Disagree strongly
66	2022-05-13 09:39:33	2022-05-13 10:49:10	anonymous		Agree to Participate	0.5	Male	Disagree a little	Neither agree nor disagree	Agree a little	Neither agree nor disagree	Agree strongly	Neither agree nor disagree	Agree a little	Neither agree nor disagree	Agree a little	Agree a little	Agree a little	Neither agree nor disagree	Disagree a little	Disagree strongly	Neither agree nor disagree	Agree a little	Disagree a little	Agree strongly	Disagree a little	Disagree strongly	Agree a little	Neither agree nor disagree	Disagree a little	Disagree a little	Disagree strongly	Disagree strongly	Agree a little	Neither agree nor disagree	Disagree a little	Disagree strongly	Neither agree nor disagree	Agree a little	Disagree a little	Agree strongly	Disagree a little	Disagree strongly	Agree a little	Neither agree nor disagree	Disagree a little	Disagree a little	Disagree strongly	Disagree strongly
67	2022-05-13 09:42:04	2022-05-13 10:49:27	anonymous		Agree to Participate	0.5	Male	Agree a little	Agree a little	Agree strongly	Disagree a little	Neither agree nor disagree	Disagree strongly	Disagree a little	Agree a little	Agree strongly	Neither agree nor disagree	Neither agree nor disagree	Agree a little	Disagree strongly	Disagree strongly	Neither agree nor disagree	Disagree a little	Disagree strongly	Agree strongly	Agree a little	Agree a little	Disagree strongly	Disagree strongly	Neither agree nor disagree	Neither agree nor disagree	Disagree strongly	Disagree strongly	Neither agree nor disagree	Neither agree nor disagree	Disagree strongly	Disagree strongly	Neither agree nor disagree	Agree a little	Disagree strongly	Agree strongly	Neither agree nor disagree	Agree a little	Disagree strongly	Disagree strongly	Agree a little	Agree a little	Disagree a little	Disagree strongly
68	2022-05-13 09:39:43	2022-05-13 10:50:58	anonymous		Agree to Participate	3.5	Male	Neither agree nor disagree	Agree a little	Agree a little	Agree a little	Agree a little	Agree strongly	Neither agree nor disagree	Agree a little	Disagree strongly	Agree strongly	Agree strongly	Agree strongly	Disagree a little	Neither agree nor disagree	Agree strongly	Agree strongly	Disagree strongly	Agree strongly	Agree a little	Agree a little	Disagree a little	Agree a little	Agree a little	Agree a little	Disagree strongly	Disagree strongly	Agree strongly	Agree strongly	Disagree a little	Disagree a little	Agree strongly	Agree strongly	Agree strongly	Agree strongly	Agree strongly	Agree strongly	Disagree a little	Disagree a little	Agree strongly	Agree strongly	Disagree a little	Disagree strongly
69	2022-05-13 11:09:28	2022-05-13 12:34:05	anonymous		Agree to Participate	1	Male	Agree a little	Neither agree nor disagree	Agree strongly	Disagree a little	Disagree a little	Disagree strongly	Neither agree nor disagree	Agree a little	Agree strongly	Agree strongly	Agree a little	Neither agree nor disagree	Agree a little	Agree a little	Neither agree nor disagree	Neither agree nor disagree	Disagree a little	Agree strongly	Agree a little	Agree a little	Disagree a little	Disagree strongly	Agree a little	Agree a little	Neither agree nor disagree	Disagree strongly	Neither agree nor disagree	Disagree a little	Neither agree nor disagree	Disagree a little	Neither agree nor disagree	Neither agree nor disagree	Disagree a little	Agree strongly	Disagree a little	Disagree a little	Disagree strongly	Agree a little	Disagree a little	Disagree strongly	Disagree strongly	Disagree strongly
70	2022-05-13 11:09:22	2022-05-13 12:34:08	anonymous		Agree to Participate	1.5	Male	Agree a little	Agree a little	Agree a little	Neither agree nor disagree	Disagree strongly	Agree a little	Neither agree nor disagree	Agree a little	Disagree a little	Agree strongly	Agree a little	Disagree a little	Agree a little	Disagree strongly	Neither agree nor disagree	Neither agree nor disagree	Agree a little	Agree strongly	Agree a little	Agree a little	Disagree strongly	Disagree strongly	Neither agree nor disagree	Agree a little	Neither agree nor disagree	Disagree strongly	Disagree a little	Neither agree nor disagree	Neither agree nor disagree	Disagree a little	Disagree strongly	Disagree a little	Neither agree nor disagree	Agree strongly	Agree a little	Agree a little	Disagree strongly	Disagree strongly	Neither agree nor disagree	Agree a little	Agree a little	Disagree strongly
71	2022-05-13 11:09:42	2022-05-13 12:34:16	anonymous		Agree to Participate	15	Male	Agree a little	Disagree a little	Agree strongly	Agree a little	Disagree a little	Neither agree nor disagree	Agree a little	Neither agree nor disagree	Disagree a little	Agree a little	Disagree a little	Disagree strongly	Neither agree nor disagree	Disagree a little	Disagree a little	Disagree a little	Disagree strongly	Agree strongly	Neither agree nor disagree	Agree a little	Neither agree nor disagree	Disagree strongly	Neither agree nor disagree	Agree a little	Disagree a little	Disagree strongly	Disagree a little	Disagree a little	Agree a little	Disagree a little	Disagree strongly	Disagree strongly	Disagree strongly	Agree strongly	Agree a little	Neither agree nor disagree	Disagree a little	Disagree strongly	Neither agree nor disagree	Neither agree nor disagree	Disagree a little	Disagree strongly
72	2022-05-13 11:10:31	2022-05-13 12:34:16	anonymous		Agree to Participate	1.5	Male	Neither agree nor disagree	Neither agree nor disagree	Agree a little	Agree a little	Neither agree nor disagree	Disagree a little	Disagree a little	Neither agree nor disagree	Disagree a little	Disagree a little	Neither agree nor disagree	Disagree a little	Neither agree nor disagree	Agree a little	Neither agree nor disagree	Disagree a little	Neither agree nor disagree	Disagree strongly	Agree a little	Agree a little	Disagree a little	Agree a little	Neither agree nor disagree	Neither agree nor disagree	Disagree a little	Agree strongly	Neither agree nor disagree	Neither agree nor disagree	Disagree a little	Agree a little	Neither agree nor disagree	Disagree a little	Disagree a little	Disagree strongly	Neither agree nor disagree	Agree a little	Disagree a little	Agree a little	Neither agree nor disagree	Neither agree nor disagree	Disagree strongly	Agree strongly
73	2022-05-13 11:09:30	2022-05-13 12:34:58	anonymous		Agree to Participate	3	Female	Agree strongly	Disagree strongly	Agree a little	Agree a little	Disagree strongly	Disagree a little	Disagree a little	Agree a little	Disagree a little	Agree strongly	Agree a little	Neither agree nor disagree	Disagree a little	Disagree a little	Neither agree nor disagree	Agree a little	Neither agree nor disagree	Disagree strongly	Agree a little	Agree a little	Disagree strongly	Disagree strongly	Agree a little	Agree a little	Agree a little	Agree strongly	Agree strongly	Agree strongly	Disagree strongly	Disagree strongly	Agree a little	Agree a little	Agree a little	Disagree strongly	Agree strongly	Agree a little	Disagree strongly	Disagree a little	Agree a little	Agree a little	Agree a little	Agree strongly
74	2022-05-13 12:04:29	2022-05-13 12:34:59	anonymous		Agree to Participate	6.5	Male	Agree a little	Neither agree nor disagree	Disagree strongly	Agree strongly	Disagree strongly	Agree strongly	Disagree a little	Agree strongly	Disagree a little	Agree strongly	Agree strongly	Agree a little	Agree a little	Disagree a little	Agree a little	Agree a little	Agree a little	Agree strongly	Agree a little	Agree a little	Disagree a little	Disagree a little	Agree strongly	Agree strongly	Agree strongly	Disagree strongly	Agree strongly	Agree a little	Disagree strongly	Disagree strongly	Agree a little	Agree strongly	Agree strongly	Agree strongly	Agree strongly	Agree a little	Disagree strongly	Disagree a little	Agree a little	Agree strongly	Agree strongly	Disagree strongly
75	2022-05-13 11:09:12	2022-05-13 12:35:02	anonymous		Agree to Participate	2	Male	Disagree a little	Disagree a little	Agree a little	Disagree a little	Disagree a little	Agree a little	Agree strongly	Neither agree nor disagree	Agree a little	Agree a little	Agree a little	Neither agree nor disagree	Disagree a little	Disagree strongly	Disagree a little	Neither agree nor disagree	Disagree strongly	Disagree strongly	Neither agree nor disagree	Neither agree nor disagree	Neither agree nor disagree	Disagree strongly	Disagree a little	Disagree a little	Disagree strongly	Agree strongly	Disagree a little	Neither agree nor disagree	Neither agree nor disagree	Disagree strongly	Disagree a little	Disagree a little	Disagree strongly	Disagree strongly	Disagree a little	Neither agree nor disagree	Agree a little	Disagree strongly	Disagree a little	Neither agree nor disagree	Disagree strongly	Agree strongly
76	2022-05-13 11:09:20	2022-05-13 12:35:30	anonymous		Agree to Participate	2.5	Male	Disagree a little	Agree a little	Disagree a little	Agree a little	Disagree strongly	Neither agree nor disagree	Disagree a little	Agree a little	Disagree strongly	Agree a little	Agree a little	Agree a little	Disagree a little	Disagree strongly	Agree a little	Agree strongly	Neither agree nor disagree	Agree strongly	Agree a little	Agree a little	Disagree strongly	Disagree strongly	Agree strongly	Agree a little	Disagree a little	Disagree strongly	Agree a little	Agree a little	Disagree strongly	Disagree strongly	Agree a little	Agree a little	Agree a little	Agree strongly	Agree a little	Neither agree nor disagree	Disagree strongly	Disagree strongly	Agree a little	Agree a little	Neither agree nor disagree	Disagree strongly
77	2022-05-13 11:09:23	2022-05-13 12:36:04	anonymous		Agree to Participate	2	Male	Agree strongly	Agree a little	Agree a little	Neither agree nor disagree	Neither agree nor disagree	Disagree a little	Disagree strongly	Agree a little	Agree a little	Agree a little	Agree a little	Neither agree nor disagree	Disagree strongly	Disagree strongly	Neither agree nor disagree	Neither agree nor disagree	Neither agree nor disagree	Disagree strongly	Agree strongly	Agree a little	Disagree a little	Disagree a little	Neither agree nor disagree	Agree a little	Neither agree nor disagree	Agree strongly	Agree a little	Agree a little	Disagree a little	Neither agree nor disagree	Neither agree nor disagree	Agree a little	Disagree a little	Disagree strongly	Agree strongly	Agree a little	Disagree a little	Disagree a little	Neither agree nor disagree	Agree a little	Agree a little	Agree strongly
[truncated: 18 more columns]
